# Supplementary material for: Biological nitrogen fixation in maize: optimizing nitrogenase expression in a root-associated diazotroph
Source: PubMed Central journal article supplement — J Exp Bot. 2020 Apr 8;71(15):4591–603. doi: 10.1093/jxb/eraa176 (PMC7382387; doi:10.1093/jxb/eraa176), 2020-04-08
Supplement: eraa176_suppl_supplementary_material.pdf [file eraa176_suppl_supplementary_material.pdf]

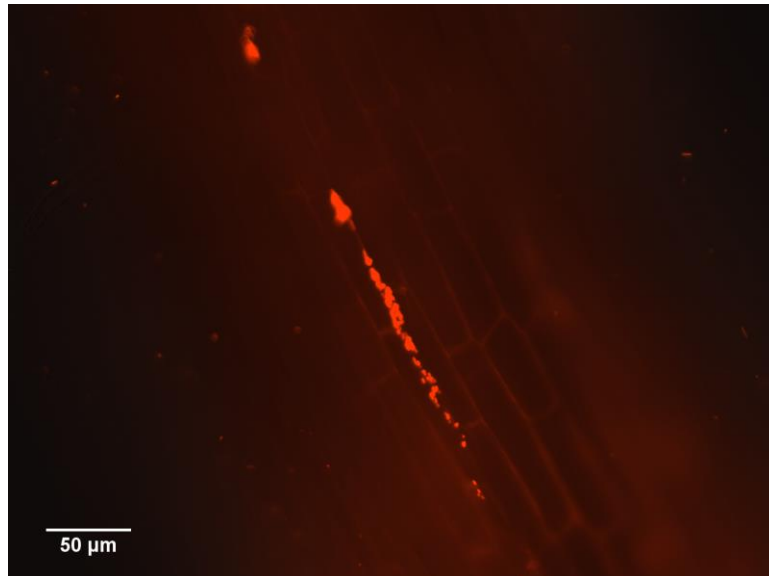

**Supplementary Figure 1. *K. sacchari* PBC6.1 colonizes the surface of corn roots.** PBC6.1 harboring a plasmid with an RFP expression cassette was inoculated onto a corn seed planted on agar in a growth chamber. After seven days of plant growth, the roots were harvested and analyzed via fluorescence microscopy. PBC6.1 can be observed colonizing the perimeters of plant root cells.

Supplementary Table 1. Primers used for colonization studies

| Target                                   | Forward               | Reverse                 | Probe                                                |
|------------------------------------------|-----------------------|-------------------------|------------------------------------------------------|
| <i>nifH-por2</i><br>intergenic<br>region | GCTTCCGACTGCATCTCCAT  | CAAGGCTGGGATATTCGGTTGGC | /56-FAM/TTCATCTTC/ZEN/<br>ACGGTCGGTCTGGC/3IABkFQ/    |
| $\Delta$ nI::Prm1                        | TAAACTGGTACTGGGGCAACT | CAAAATCGAAGGCCAGACGGTAT | /56-FAM/AAAGTTGCCT/ZEN/<br>GACCCACGATTCCC/3IABkFQ/   |
| $\Delta$ nI::Prm5                        | GGTGCACTCTTTGCAATGGTT | GCGCAGTCTCGTAAATTGCC    | /56-FAM/CAGGAGTGT/ZEN/<br>GCCGATGACCCGTGAAT/3IABkFQ/ |
